# Supplementary material
Source: MDPI journal article supplement (https://www.mdpi.com/2073-4433/10/11/687)
Supplement: s1 [file s1]

# Supplemental information

R. Lhotka<sup>1,\*</sup>, P. Pokorná<sup>2</sup> and N. Zíková<sup>1,2,\*</sup>

<sup>1</sup> Institute for Environmental Studies, Faculty of Science, Charles University in Prague, Albertov 6, 128 43 Prague 2, Czech Republic

<sup>2</sup> Department of Aerosol Chemistry and Physics, Institute of Chemical Process Fundamentals of the Czech Academy of Sciences, Rozvojová 1/135, 165 02 Prague 6, Czech Republic

\* Correspondence: lhotka@icpf.cas.cz (R.L.), zikova@icpf.cas.cz (N.Z.)

## PAH Analysis Method

The exposed PUF disk and Quartz filters, respectively, are inserted in the automatic extractor Büchi B-811 and a defined amount of a defined standard mixture, composed of 7 deuterated PAHs, is added to individual samples. PUF disks are extracted using 150 mL of 7% diethyl ether in hexane; QFs are extracted in 100 mL of 7% methanol in dichloromethane. In the next step, individual extracts are thickened to the volume of approx. 20 mL and are analytically transferred to tubes. Then the samples are concentrated using a combined concentrator to reach the volume of approx. 0.5 mL. Subsequently, the samples are purified by column chromatography using deactivated silica gel with an exact water content. The prepared sample is then analysed by gas chromatography with mass detection (GC/MS). The weight detector works as a simple quadrupole. Separation is done using the column Rxi-PAH (30 m × 0.25 mm × 0.1 µm); He 1.5 mL/min is used as the carrier gas; the temperature program is: 80 °C, 15 °C/min to 180 °C (0 min), 5 °C/min to 310 °C (20 min). Splitless injection at 280 °C is used. The limit of quantification can be determined from the chromatography record for the calibration solution with the lowest concentration according to the signal / noise (S/N) ratio [1,2]. The above described processing of samples is done at a CHMI laboratory – Ústí nad Labem branch office.

**Table S1.** Overall uncertainty and detection limit of measured PAHs (taken from monitoring CHMI).

| PAH      | Overall uncertainty (%) | Detection limit (ng·m <sup>-3</sup> ) |
|----------|-------------------------|---------------------------------------|
| ANT      | 17.6                    | 0.02                                  |
| BaA      | 20.3                    | 0.06                                  |
| BaP, BeP | 22.8                    | 0.06                                  |
| BbF      | 28.2                    | 0.06                                  |
| BghiP    | 19.7                    | 0.06                                  |
| BkF      | 25.2                    | 0.06                                  |
| CHRY     | 21.5                    | 0.06                                  |
| DBahA    | 27.2                    | 0.06                                  |
| PHE      | 24.3                    | 0.22                                  |
| FLT      | 26.8                    | 0.20                                  |
| FLA      | 28.2                    | 0.04                                  |
| IP       | 27.0                    | 0.06                                  |
| PY       | 23.8                    | 0.04                                  |

**Table S2.** Diagnostic ratios, their typical values and characteristic sources (taken from [3,4]), observed trends, together with stat significance level.

| DRs                   | Value       | Sources             | p    | trend (ng·m <sup>-3</sup> year <sup>-1</sup> ) |
|-----------------------|-------------|---------------------|------|------------------------------------------------|
| FLA/(FLA + PY)        | >0.5        | solid fuels comb.   | 0.05 | +0.01                                          |
| ANT/(ANT + FEN)       | <0.1        | pyrogenic sources   | -    | -                                              |
| BaP/BghiP             | >1.25, <0.5 | brown coal, traffic | -    | -                                              |
| LMW/HMW <sup>1</sup>  | <1          | pyrogenic sources   | -    | -                                              |
| COMB/SUM <sup>2</sup> | ~1          | solid fuels comb.   | 0.01 | +0.01                                          |

<sup>1</sup>(ANT+PHE+FLA+FLT) / (BaA+BaP+BbF+BghiP+BkF+DBaH+A+PHE+FLA+FLT+CHRY+IP+PY).

<sup>2</sup>(BaA+BaP+BbF+BghiP+BkF+ DBaH+A+PHE+ FLA+FLT +CHRY+ IP+PY) /  $\sum$ all PAHs.

**Table S3.** Summary of the mean and standard deviations of BaP and PAH SUM between 1996 and 2016; the BaP and PAH SUM concentrations for 1996–2005 are based on the study of Dvorská et al. [5].

| Year | Mean BaP (ng·m <sup>-3</sup> ) | Mean SUM (ng·m <sup>-3</sup> ) |
|------|--------------------------------|--------------------------------|
| 1996 | 0.3 ± 0.6                      | 33.9 ± 32.6                    |
| 1997 | 0.7 ± 2.0                      | 36.3 ± 80.4                    |
| 1998 | 0.3 ± 0.6                      | 17.3 ± 21.2                    |
| 1999 | 0.3 ± 0.3                      | 14.6 ± 14.2                    |
| 2000 | 0.2 ± 0.3                      | 13.2 ± 14.1                    |
| 2001 | 0.2 ± 0.4                      | 14.3 ± 13.9                    |
| 2002 | 0.6 ± 1.0                      | 23.4 ± 29.8                    |
| 2003 | 0.4 ± 0.7                      | 19.8 ± 28.3                    |
| 2004 | 0.3 ± 0.5                      | 16.8 ± 17.2                    |
| 2005 | 0.4 ± 0.6                      | 19.7 ± 23.6                    |
| 2006 | 0.9 ± 1.1                      | 32.1 ± 40.8                    |
| 2007 | 0.7 ± 0.9                      | 22.0 ± 24.8                    |
| 2008 | 0.4 ± 0.5                      | 17.4 ± 18.0                    |
| 2009 | 0.5 ± 0.5                      | 18.4 ± 22.2                    |
| 2010 | 0.4 ± 0.9                      | 23.3 ± 28.2                    |
| 2011 | 0.4 ± 0.7                      | 19.1 ± 22.6                    |
| 2012 | 0.6 ± 1.1                      | 23.9 ± 37.5                    |
| 2013 | 0.7 ± 1.0                      | 23.7 ± 27.1                    |
| 2014 | 0.4 ± 0.5                      | 16.3 ± 15.6                    |
| 2015 | 0.4 ± 0.4                      | 13.5 ± 11.5                    |
| 2016 | 0.4 ± 0.4                      | 12.7 ± 12.2                    |

**Table S4.** Summary of PMF diagnostics for PAHs composition.

| Diagnostic                 | NAOK PAH Summer | NAOK PAH Winter |
|----------------------------|-----------------|-----------------|
| Qexpected/theoretical      | 4191            | 4128            |
| Qtrue                      | 4222            | 4241            |
| Qrobust                    | 4222            | 4241            |
| Species Q/Qexpected >2     | 4 samples       | 8 samples       |
| Extra modeling uncertainty | 2.3%            | 0%              |
| DISP swaps                 | 0               | 0               |
| BS mapping                 | 100%            | 100%            |

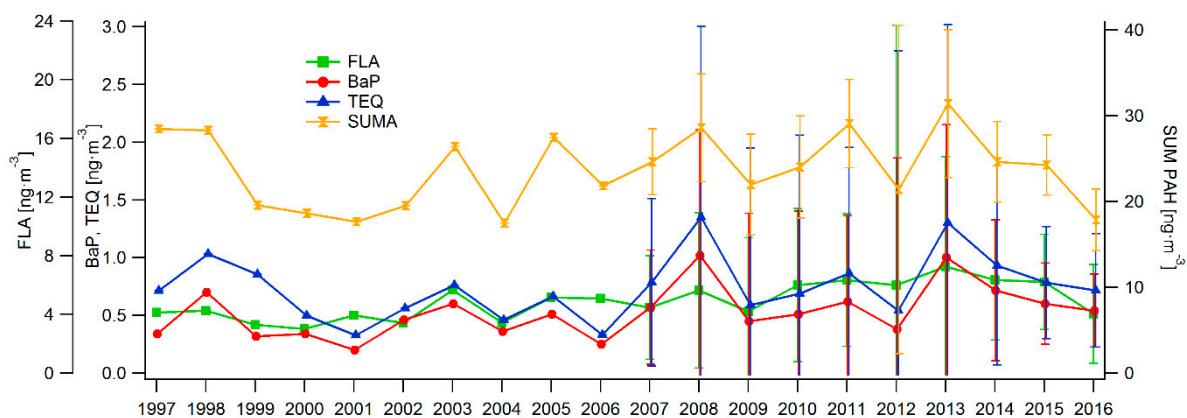

**Figure S1.** The median concentrations ( $\pm$ standard deviation calculated for this study) of BaP, TEQ, FLA and PAH SUM concentrations in the cold half-year (October - March). 2007 stands for winter season 2006 – 2007 etc. Data till 2006 are from Dvorská at al. [5]. The markers are shifted for a better readability.

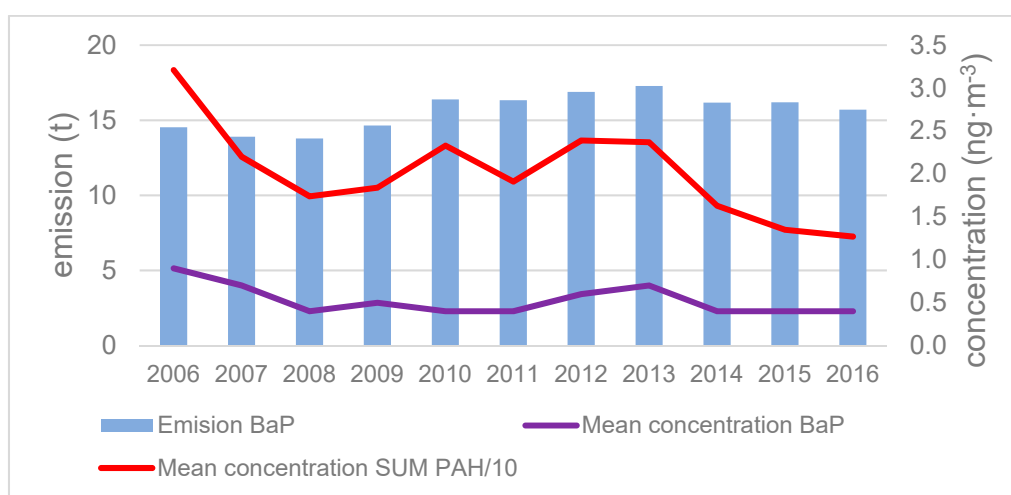

**Figure S2.** BaP emission production and concentration of BaP and PAH SUM/10 in the Czech Republic between the years 2006 and 2016 (taken from: [6]).

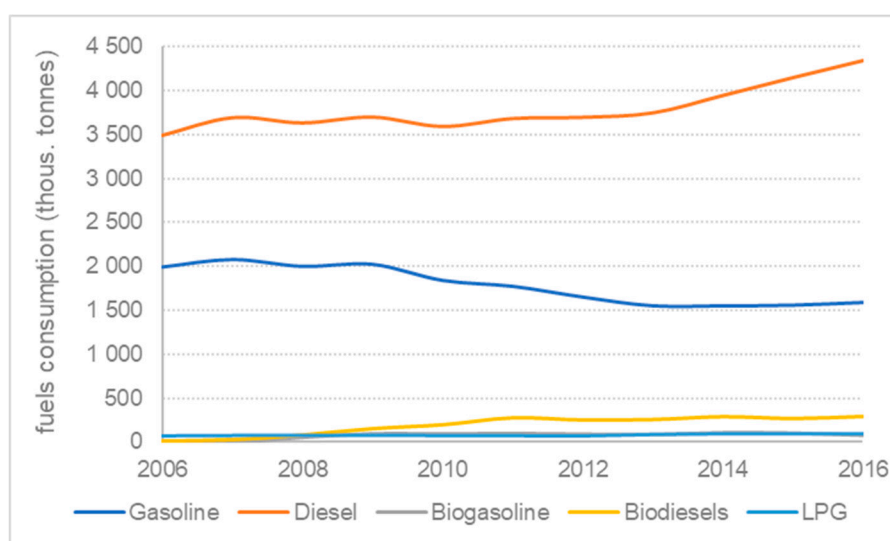

**Figure S3.** Fuels consumption used for transportation in the Czech Republic between the years 2006 and 2016 (taken from: [7]).

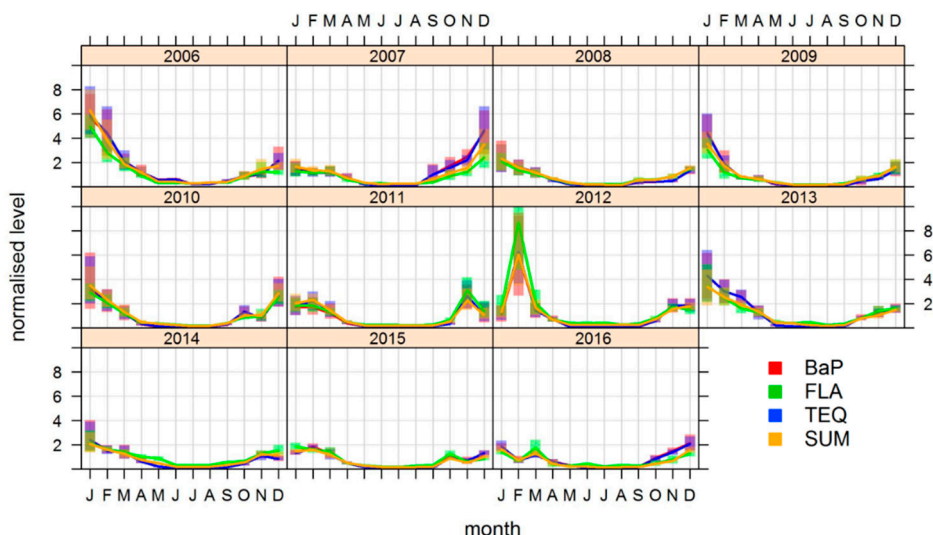

**Figure S4.** Annual cycles of selected PAHs (BaP, TEQ, FLA and PAH SUM) for the years from 2006 to 2016.

**Table S5.** Diagnostic ratios for PMF factors for warm (W) and cold (C) part of the year.

| DRs                   | Combustion<br>W; C | Mixed<br>W; C | Nat. gas combustion<br>W; C |
|-----------------------|--------------------|---------------|-----------------------------|
| FLA/(FLA + PY)        | 0.75; 0.79         | 0.60; -       | -; 0.57                     |
| ANT/(ANT + FEN)       | 0.01; 0.01         | 0.16; 0.73    | 0.06; -                     |
| BaP/BghiP             | 20.40; 3.21        | 2.70; 0.08    | 0.39; 27.47                 |
| LMW/HMW <sup>1</sup>  | 6.54; 5.42         | 0.34; 0.25    | 6.54; 1.04                  |
| COMB/SUM <sup>2</sup> | 0.98; 0.97         | 0.76; 0.77    | 0.82; 0.87                  |

<sup>1</sup>(ANT+PHE+FLA+FLT) / (BaA+BaP+BbF+BghiP+BkF+DBaA+PHE+FLA+FLT+CHRY+IP+PY).

<sup>2</sup>(BaA+BaP+BbF+BghiP+BkF+ DBaA+PHE+ FLA+FLT +CHRY+ IP+PY) /  $\sum$ all PAHs.

## References

1. ČSN EN 12341 – Air quality - Reference gravimetric method for determination of mass concentration of PM<sub>10</sub> and PM<sub>2.5</sub> aerosol particles.
2. ČSN EN 15549 – Air quality - Standard method for the determination of benzo [a] pyrene in ambient air.
3. Dvorská, A.; Lammel, G.; Klánová, J. (2011). Use of diagnostic ratios for studying source apportionment and reactivity of ambient polycyclic aromatic hydrocarbons over Central Europe. *Atmos. Environ.*, **2011** 45, 420-427.
4. Ravindra, K.; Sokhi, R.; Van Grieken, R. Atmospheric polycyclic aromatic hydrocarbons: source attribution, emission factors and regulation. *Atmos. Environ.* **2008**, 42(13), 2895-2921.
5. Dvorská, A.; Komprdová, K.; Lammel, G.; Klánová, J.; Plachá, H. Polycyclic aromatic hydrocarbons in background air in central Europe—seasonal levels and limitations for source apportionment. *Atmos. Environ.* **2012**, 46, 147-154.
6. CHMI. Air pollution in the Czech Republic in 2017. Praha: ČHMÚ. ISBN 978-80-87577-72-1, **2018**. CHMI. Air pollution in the Czech Republic in 2017. Praha: ČHMÚ. ISBN 978-80-87577-72-1, **2018**.
7. Ministry of transport [online]. Transport Yearbook Czech Republic 2017 [accessed 2019-06-26]. **2017**, Available online: [https://www.sydos.cz/cs/rocnka\\_pdf/Rocenka\\_dopravy\\_2017.pdf](https://www.sydos.cz/cs/rocnka_pdf/Rocenka_dopravy_2017.pdf).
